# Supplementary material
Source: PubMed Central journal article supplement (PMC6413485)

Increase in temperature (°C)

6.0  
5.5  
5.0  
4.5  
4.0  
3.5  
3.0  
2.5  
2.0  
1.5  
1.0  
0.5  
0.0

2000-09

2020-29

2040-49

2060-69

2080-89

Year

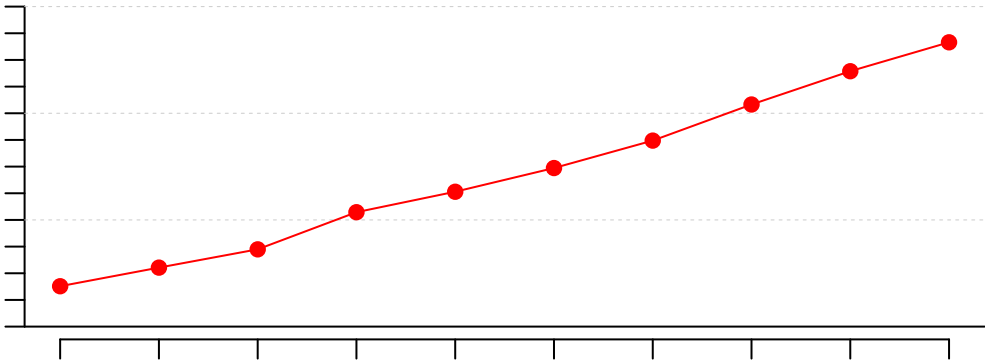

Supplement: 10584_2018_2274_MOESM3_ESM.pdf [file 10584_2018_2274_MOESM3_ESM.pdf]
