# Supplementary material
Source: PubMed Central journal article supplement (PMC6413485)

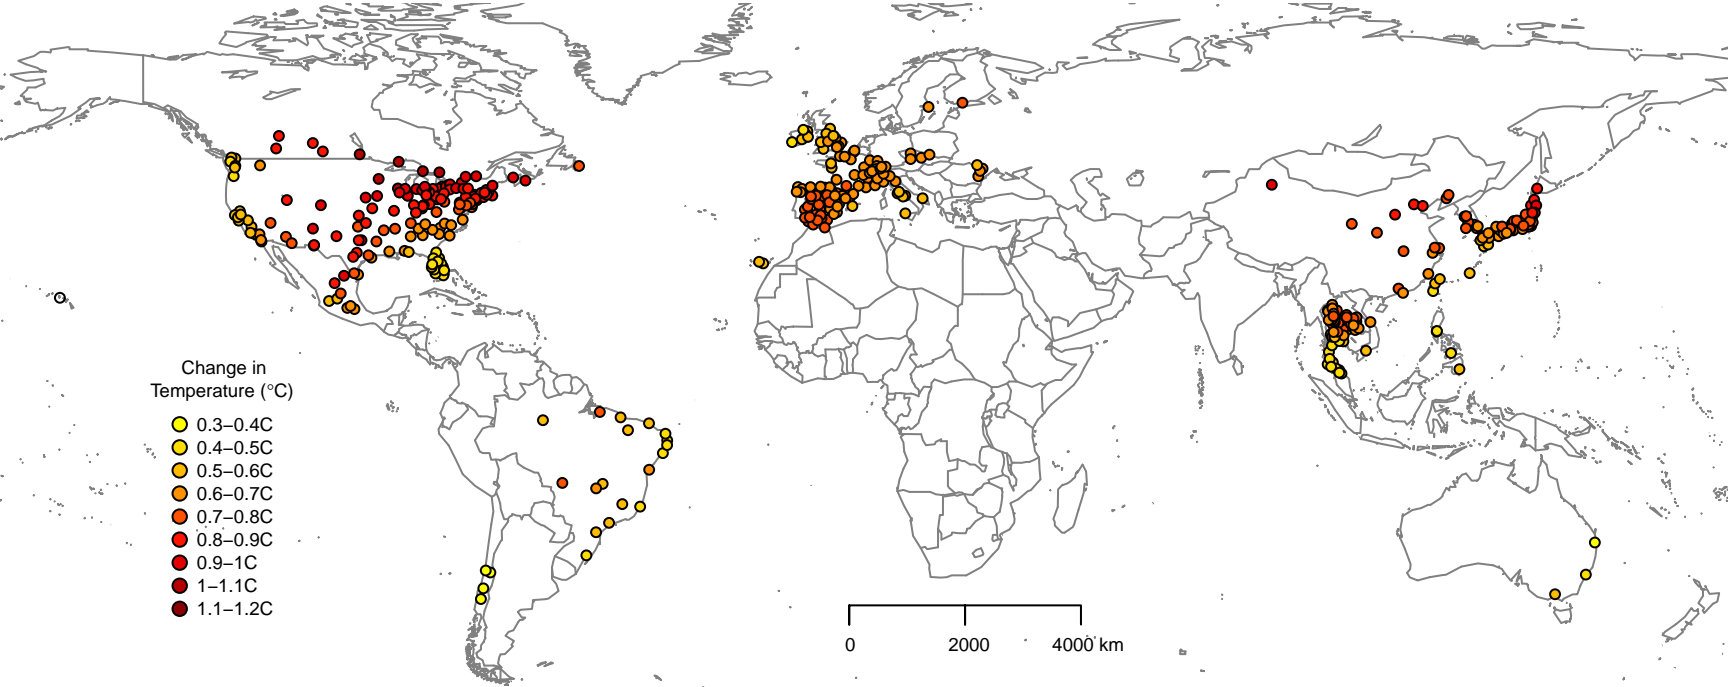

Supplement: 10584_2018_2274_MOESM4_ESM.pdf [file 10584_2018_2274_MOESM4_ESM.pdf]
